# Supplementary material
Source: PubMed Central journal article supplement (PMC9178875)
Supplement: 12916_2022_2406_MOESM1_ESM.pdf [file 12916_2022_2406_MOESM1_ESM.pdf]

Lorem ipsum

### Additional file 1: Fig. S1

Related to Figure 2. Values of anti-SARS-CoV-2 spike IgG antibodies before immunization, and post-first and -second dose.

|                           | AUC <120      | AUC 120-300   | AUC >300      |
|---------------------------|---------------|---------------|---------------|
| Pre-Vax<br>Mean(SD)       | 54.42 ± 27.33 | 219.2 ± 53.04 | 960.9 ± 667.1 |
| 1st Dose +30d<br>Mean(SD) | 198.2 ± 192.5 | 458 ± 320.2   | 1523 ± 664.1  |
| 2st Dose +30d<br>Mean(SD) | 695.6 ± 372.2 | 682.6 ± 256.4 | 1517 ± 609.9  |
| n                         | 60            | 26            | 18            |
